# Supplementary material
Source: Springer Nature journal article supplement (https://www.springermedizin.de/resource/supplementary/13023_2008_139_MOESM1_ESM.pdf/9641772)

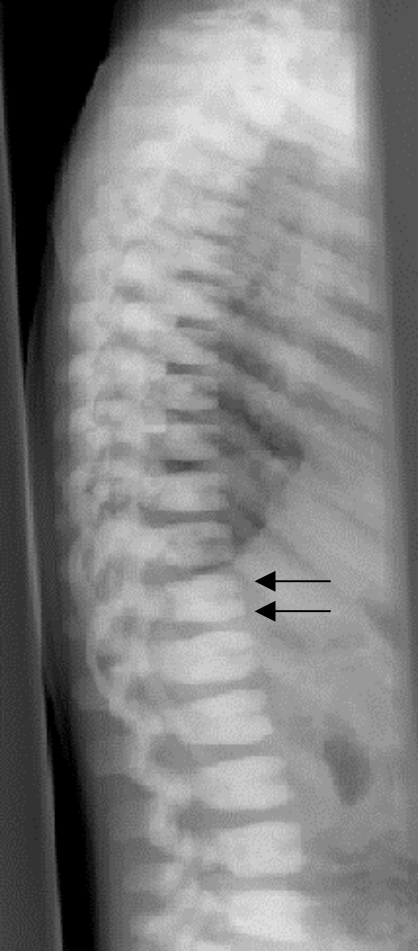

Supplement: MOESM1 [file 9641772]
